# Supplementary material for: Health-Promoting Phytochemicals from 11 Mustard Cultivars at Baby Leaf and Mature Stages
Source: Molecules. 2017 Oct 17;22(10):1749. doi: 10.3390/molecules22101749 (PMC6151555; doi:10.3390/molecules22101749)
Supplement: Supplementary file 1 [file molecules-22-01749-s001.pdf]

# Health-promoting phytochemicals from 11 mustard cultivars at baby leaf and mature stages

Marissa D. Frazie <sup>1#</sup>, Moo Jung Kim <sup>2#</sup> and Kang-Mo Ku <sup>2,\*</sup>

<sup>1</sup> Division of Animal and Nutritional Sciences, West Virginia University, Morgantown, WV 26506, USA

<sup>2</sup> Division of Plant and Soil Sciences, West Virginia University, Morgantown, WV 26506, USA

# Equally contributed

\* Correspondence: kangmo.ku@mail.wvu.edu; Tel.: +1 304-293-2549

**Table S1.** Mean weight (g DW/plant) of 11 mustard cultivars at baby leaf and mature stage.

| Cultivar              | Baby leaf         | Mature |
|-----------------------|-------------------|--------|
| Amara                 | 0.30 <sup>z</sup> | 6.01   |
| Dol San               | 0.36              | 7.38   |
| Garnet                | 0.26              | 7.27   |
| Golden Frill          | 0.34              | 4.77   |
| Jeok                  | 0.29              | 6.32   |
| Pacific Gold          | 0.36              | 6.04   |
| Red Giant             | 0.33              | 6.38   |
| Red Splendor          | 0.25              | 7.07   |
| Ruby Streaks          | 0.21              | 4.73   |
| Southern Giant Curled | 0.25              | 4.35   |
| Suehling              | 0.27              | 7.41   |

<sup>z</sup>Dry weight per plant was calculated using fresh weight measured at harvest and moisture content (90.7%) from the USDA database [1]. Means were separated within cultivar at each physiological stage by Tukey's HSD at  $p \leq 0.05$ .

**Table S2.** %RDA values for vitamin A for male and female (> 14 years) from baby leaf and mature mustard cultivars based on  $\beta$ -carotene concentration.

| Cultivar Name         | %RDA     |            |
|-----------------------|----------|------------|
|                       | For male | For female |
| Amara                 | 22.0     | 28.3       |
|                       | 26.8     | 34.5       |
| Dol San               | 43.1     | 55.4       |
|                       | 51.5     | 66.2       |
| Garnet                | 42.1     | 54.2       |
|                       | 37.2     | 47.8       |
| Golden Frill          | 32.8     | 42.2       |
|                       | 30.7     | 39.5       |
| Jeok                  | 66.5     | 85.5       |
|                       | 64.1     | 82.4       |
| Pacific Gold          | 32.2     | 41.4       |
|                       | 32.6     | 41.9       |
| Red Giant             | 33.2     | 42.6       |
|                       | 29.8     | 38.3       |
| Red Splendor          | 30.8     | 39.6       |
|                       | 29.5     | 37.9       |
| Ruby Streaks          | 31.2     | 40.1       |
|                       | 39.9     | 51.3       |
| Southern Giant Curled | 51.5     | 66.2       |
|                       | 26.5     | 34.0       |
| Suehling              | 36.2     | 46.5       |
|                       | 24.9     | 32.0       |

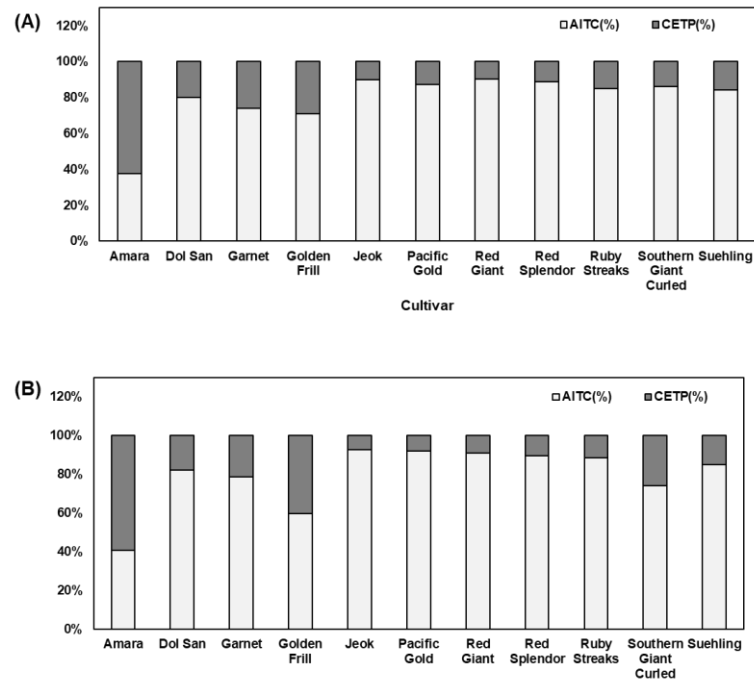

**Figure S1.** Relative ratio of AITC and CETP of 11 mustard leaves at (A) baby leaf and (B) mature stages. AITC, allyl isothiocyanate; CETP, 1-cyano-2,3-epithiopropene.

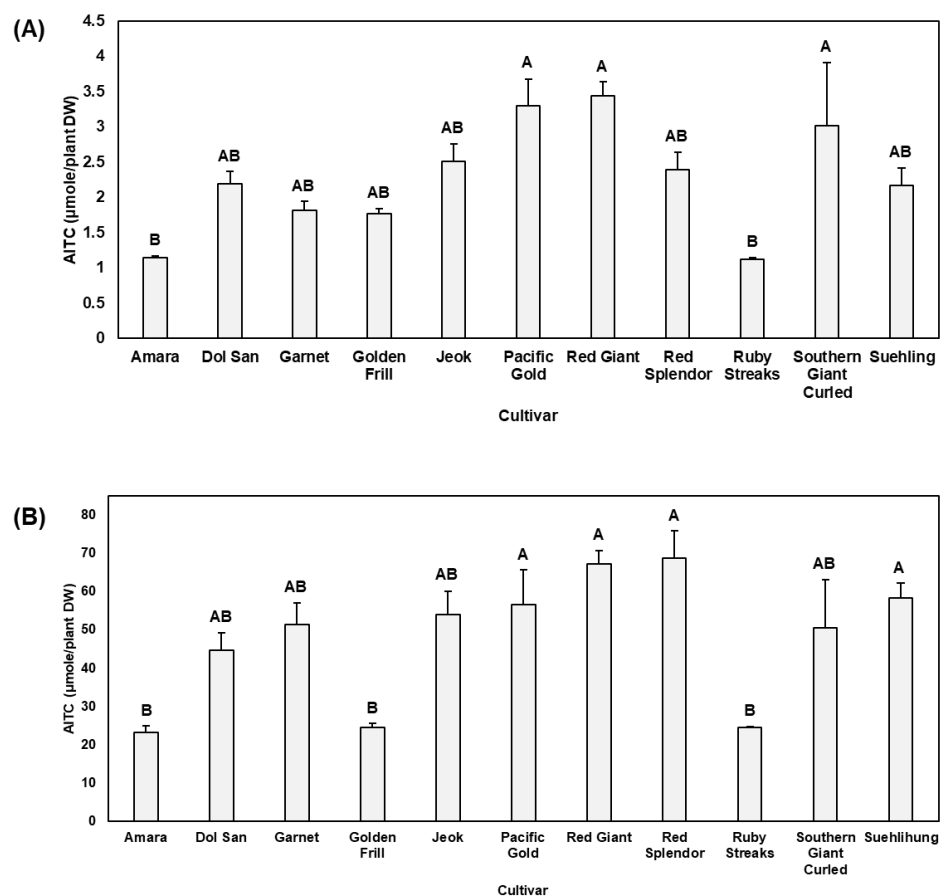

**Figure S2.** AITC produced per plant at baby leaf and mature stages. Vales were calculated using AITC concentration shown in Figure 2 and dry weight per plant shown in Table S1. Means were separated within cultivar at each physiological stage by Tukey's HSD at  $p \leq 0.05$ .

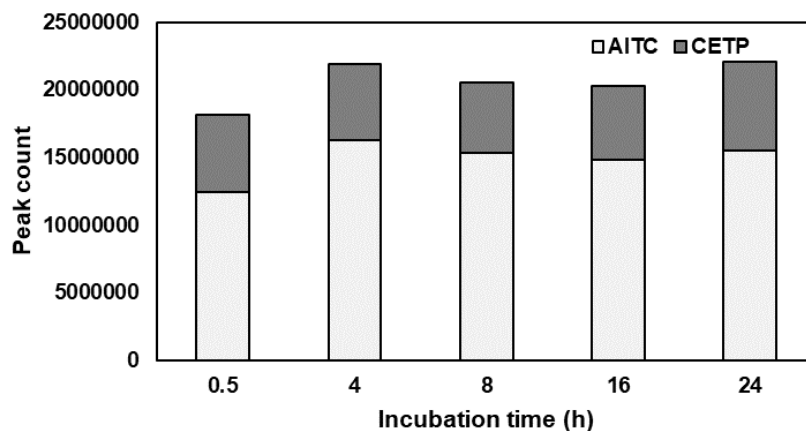

**Figure S3.** AITC and CETP produced after different incubation time. Data are the average of 3 replications. AITC with the incubation time of 4, 8, and 24 h was significantly higher than 0.5 h of incubation, but CETP and the total peak count of both compounds did not significantly differ among different incubation times by Tukey's HSD at  $p \leq 0.05$ .

## Reference

1. USDA. National Nutrient Database for Standard Reference Release 28. <http://ndb.nal.usda.gov/ndb/> (Mar. 20 2017),
